# Supplementary material
Source: ML conference proceedings conference paper supplement (https://openreview.net/forum?id=99P5Hbti02)
Supplement: supplementary_material [file attachment]

## 445 A Datasheet

### 446 A.1 Motivation

- 447 • **For what purpose was the dataset created?** In order to benchmark easily new methods  
448 on HPO and transfer HPO.
- 449 • **Who create the dataset and on behalf of which entity?** The authors of the main paper  
450 work together on behalf of their respective institution.
- 451 • **Who funded the creation of the dataset?** University of Freiburg, University of Hildesheim  
452 and Amazon.

### 453 A.2 Composition

- 454 • **What do the instances that comprises the dataset represent?** They represent evaluations  
455 of hyperparameter configurations on different tasks.
- 456 • **How many instances are there in total?** Around 6.4 million hyperparameter evaluations.
- 457 • **Does the dataset contain all possible instances or is it a sample of instances from a  
458 larger set?** No, they correspond only to evaluations of supervised classifiers and queried  
459 from OpenML platform.
- 460 • **What data does each instance consist of?** Each instance consist of a hyperparameter  
461 configuration, with their respective values and response.
- 462 • **Is there a label or target associated with each instance?** Yes, the associated accuracy  
463 (validation accuracy).
- 464 • **Is any information missing from individual instances?** No. The missing values have  
465 been imputed.
- 466 • **Are relationships between individual instances made explicit?** No.
- 467 • **Are there recommended data splits?** Yes, we recommend three splits for meta-train,  
468 meta-validation and meta-test.
- 469 • **Are there any errors, sources of noise or redundancies in the dataset?** Yes, the evalua-  
470 tions rely on third parties that may have committed mistakes in reporting the response or  
471 hyperparameter configuration values.
- 472 • **Is the dataset self-contained or does it link to or otherwise rely on external resources?**  
473 For the creation, it relied on data from OpenML.
- 474 • **Does the dataset contain data that might be considered confidential?** No.
- 475 • **Does the dataset contain data that, if viewed directly, might be offensive, insulting,  
476 threatening or might otherwise cause anxiety?** No.
- 477 • **Does the dataset relate to people?** No.
- 478 • **Does the dataset identify any sub-populations?** No.
- 479 • **Is it possible to identify individuals, either directly or indirectly?** No.
- 480 • **Does the dataset contain data that might be considered sensitive in any way?** No.

### 481 A.3 Collection process

- 482 • **How was the data associated with each instance acquired?** We queried the existing runs  
483 (evaluations) with tag `Verified_Supervised_Classification` from OpenML.
- 484 • **What mechanisms or procedures were used to collect the data?** We used the Python  
485 API for fetching the data.
- 486 • **Who was involved in the data collection process?** Only the authors of this paper.
- 487 • **Over what time frame was the data collected?** The existing runs until April 15, 2021.
- 488 • **Were any ethical review process conducted?** No.
- 489 • **Does the dataset relate to people?** No.

- **Did you collect the data from the individuals in question, or obtained it via third parties or other sources?** It was obtained from OpenML website.
- **Was any preprocessing/cleaning/labeling of the data done?** Yes, it is explain in section 5.
- **Was the "raw" data saved in addition to the preprocessed/cleaned/labeled data?** No, but the raw data can be accessed through OpenML platform.
- **Is the software used to preprocess/clean/label the instances available?** No.

#### 497 **A.4 Uses**

- **Has the dataset been used for any tasks already?** Yes, we provide examples in section 7.
- **Is there a repository that links to any or all papers or systems that use the dataset?** Yes, it is available in <https://github.com/releaunifreiburg/HPO-B>.
- **What (other) tasks could the dataset be used for?** HPO and transfer HPO.
- **Is there anything about the composition of the dataset or the way it was collected and preprocessed/cleaned/labeled that might impact future uses?** No.
- **Are there tasks for which the dataset should not be used?** No.

#### 505 **A.5 Distribution**

- **Will the dataset be distributed to third parties outside of the entity?** Yes, the dataset is publicly available.
- **How will the dataset be distributed?** Through a link hosted in our repository <https://github.com/releaunifreiburg/HPO-B>.
- **When will the dataset be distributed?** From June 8. 2021.
- **Will the dataset be distributed under a copyright or other intellectual property license?** Yes, license CC-BY.
- **Have any third parties imposed IP-based or other restrictions on the data associated with the instances?** No.
- **Do any export controls or other regulatory restrictions apply to the dataset or to individual instances?** No.

#### 517 **A.6 Maintenance**

- **Who will be supporting/hosting/maintaining the dataset?** RELEA group from the University of Freiburg.
- **How can the owner/curator/manager of the dataset be contacted?** Questions can be sent to [pineda@cs.uni-freiburg.de](mailto:pineda@cs.uni-freiburg.de) or submit an issue to the Github repository <https://github.com/releaunifreiburg/HPO-B>.
- **Is there an erratum?** No.
- **Will the dataset be updated?** No.
- **Will older versions of the dataset continue to be supported/hosted/maintained?** As new runs (evaluations) might be available in OpenML, we consider to update it periodically.
- **If other want to extend/augment/build on/contributed to the dataset, is there a mechanism for them to do so?** We might provide this possibility in the future.

### 529 **B License**

530 The meta-dataset is provided under a license CC-BY.

### 531 **C Accessibility**

532 The link to access the meta-dataset and recommendations on how to consume it are given in the  
533 following git-hub repository: <https://github.com/releaunifreiburg/HPO-B>.

## D Maintenance

We are planning to increase the meta-data set, as new search spaces with a considerable amount of evaluations are available on the platform. We may also add evaluations from third parties that agree to be part of the meta-dataset. For any suggestion or technical inquiry, we recommend to use the issue tracker of our repository.

## E Additional Meta-dataset Statistics

In this section, we present further descriptive statistics of the meta-dataset. The histogram in Figure 7a depicts how many search spaces (out of the 176) contain a specific number of evaluations. At the task level, the histogram shows a similar pattern in Figure 7b. The Figures 7c and 7d show respectively the percentage of search spaces and tasks with *at least* a given number of evaluations. As can be seen, 50% of the tasks have at least 20000 evaluations, and at least 30% contain 40.000 evaluations (out of 1907 tasks).

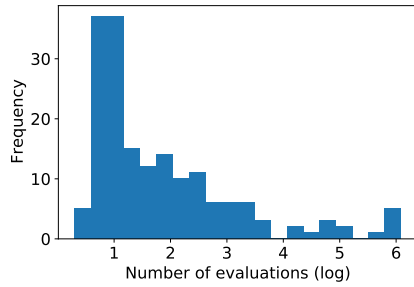

(a) Frequency of evaluations per search space.

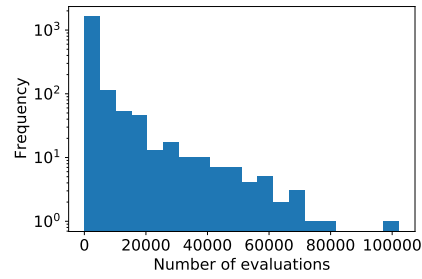

(b) Frequency of the number of evaluations per task.

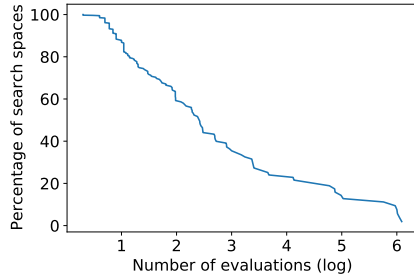

(c) Percentage of search spaces with a given number of evaluations.

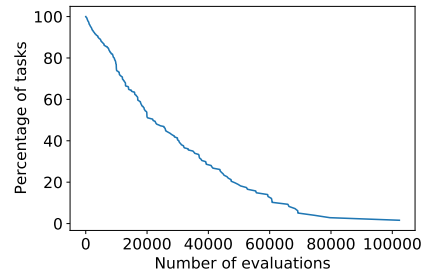

(d) Percentage of search spaces with a given number of evaluations.

Figure 7: Descriptors for the number of evaluations.

On another discourse, the distribution of the response per search-space in the meta-test split can be observed in Figure 8. It is noticeable that the distributions are multi-modal, due to the fact that they correspond to the aggregated response of aggregated tasks. It shows how every task has its own scale. A more-detailed insight of the distribution per dataset is shown in the Figure 9.

## F Additional results

Figures 12, 10, and 14 show the results of the average rank, where the ranking was computed per task. Moreover, Figure 13 presents detailed results for the average rank with different acquisition functions that was summarized in the main paper.

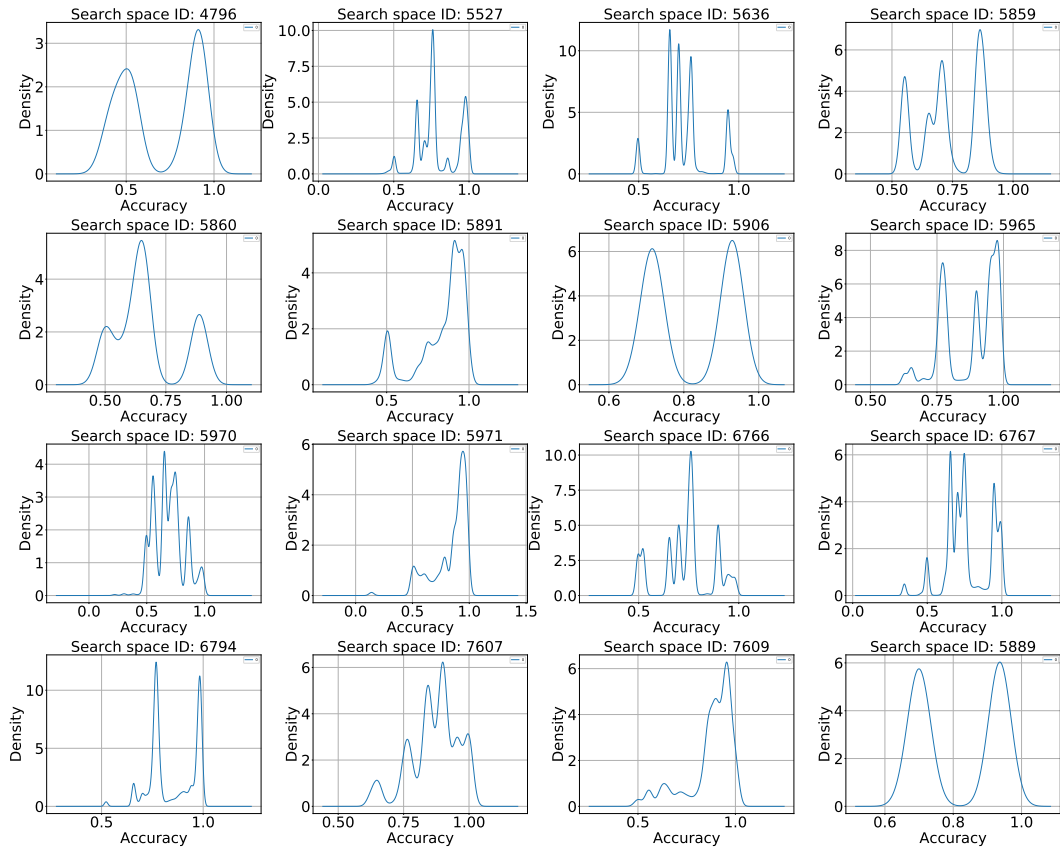

Figure 8: Density distribution of the response per search-space.

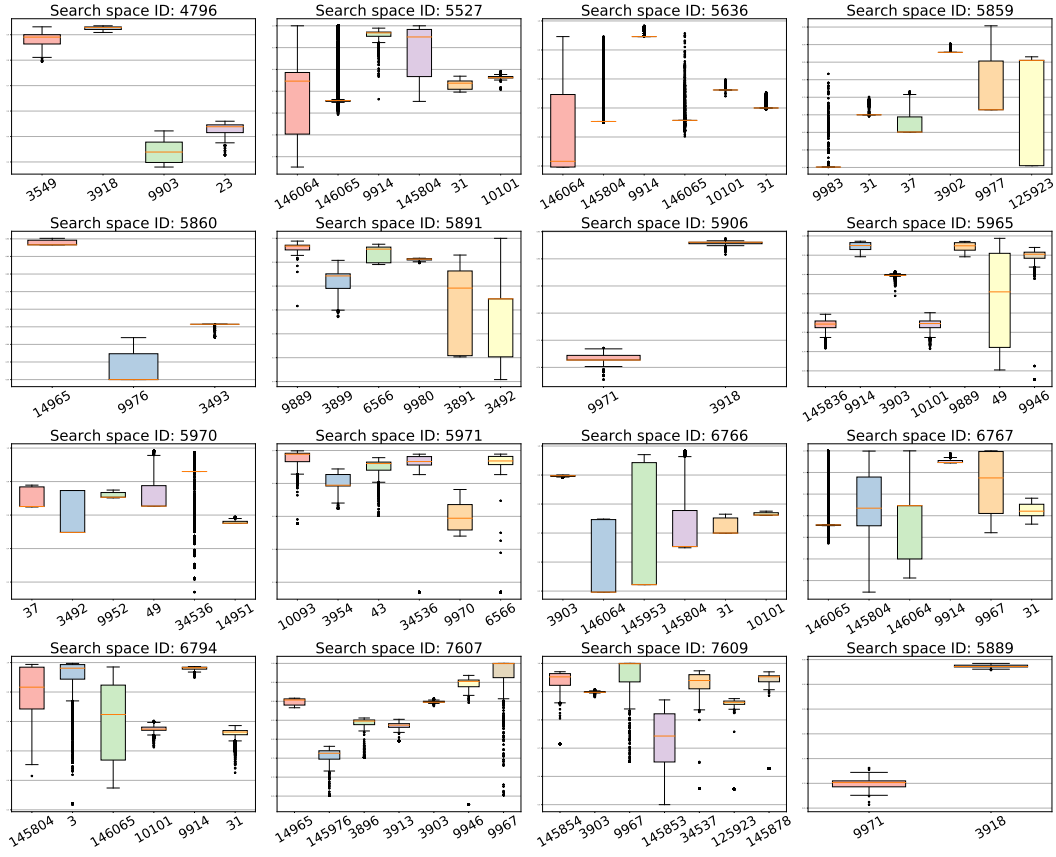

Figure 9: Distribution of the response (accuracy) per task in meta-test.

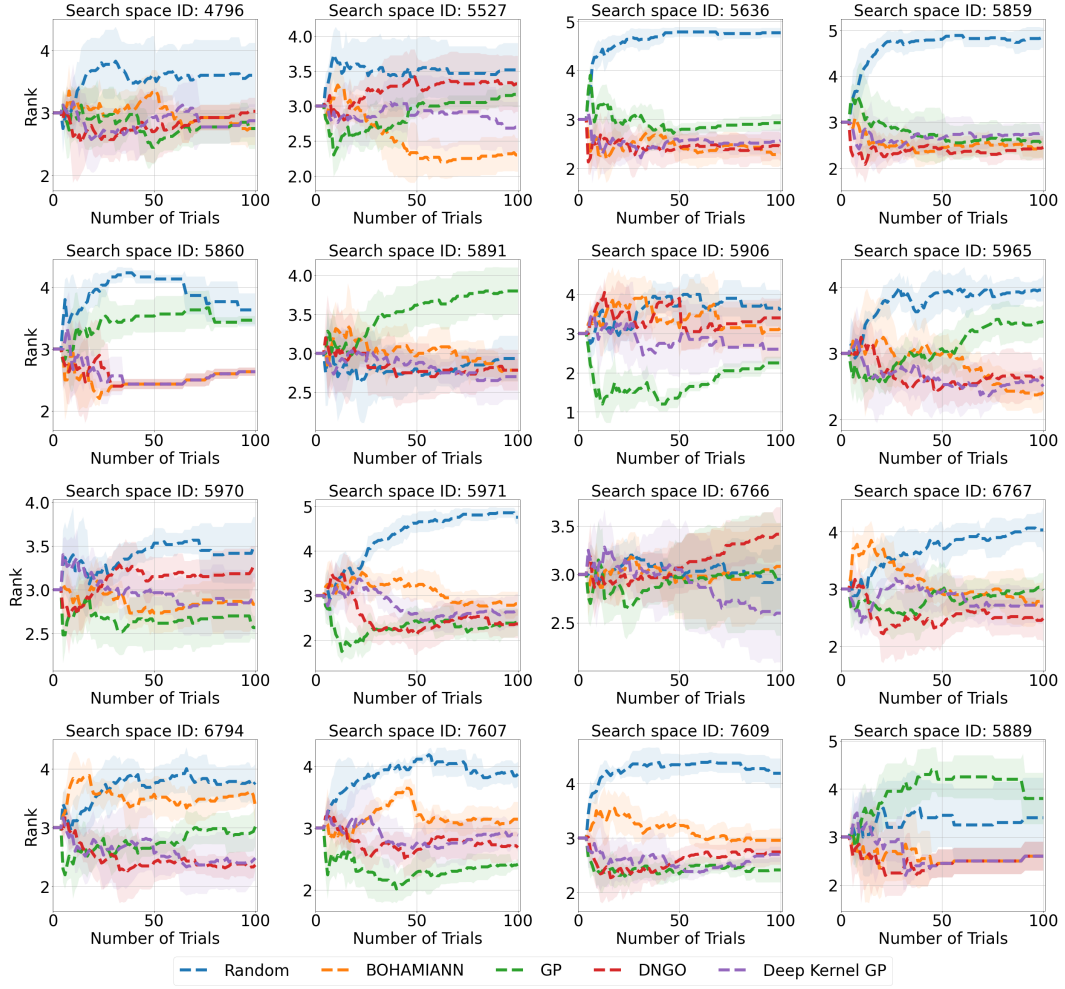

Figure 10: **Mean rank** comparison of **non-transfer** black-box HPO methods

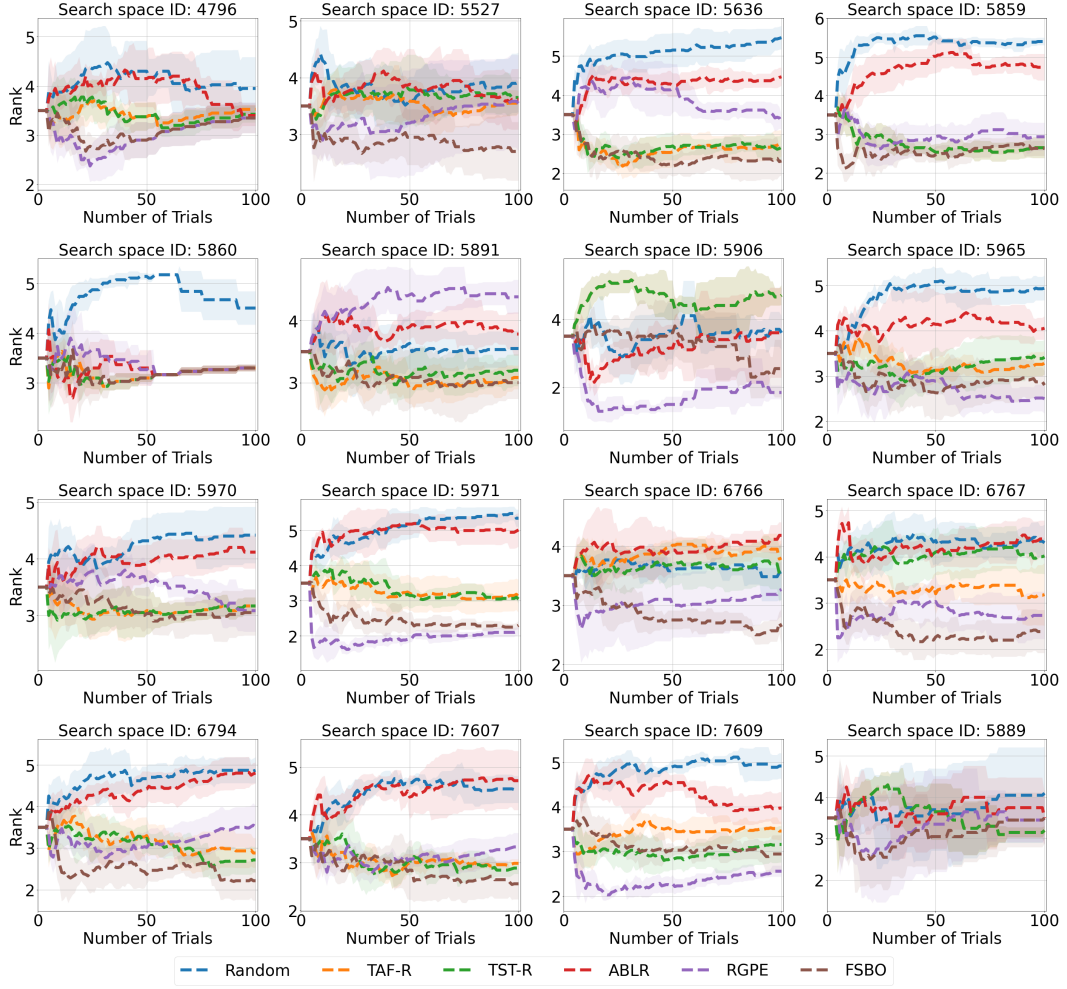

Figure 11: Mean rank comparison of transfer learning black-box HPO methods

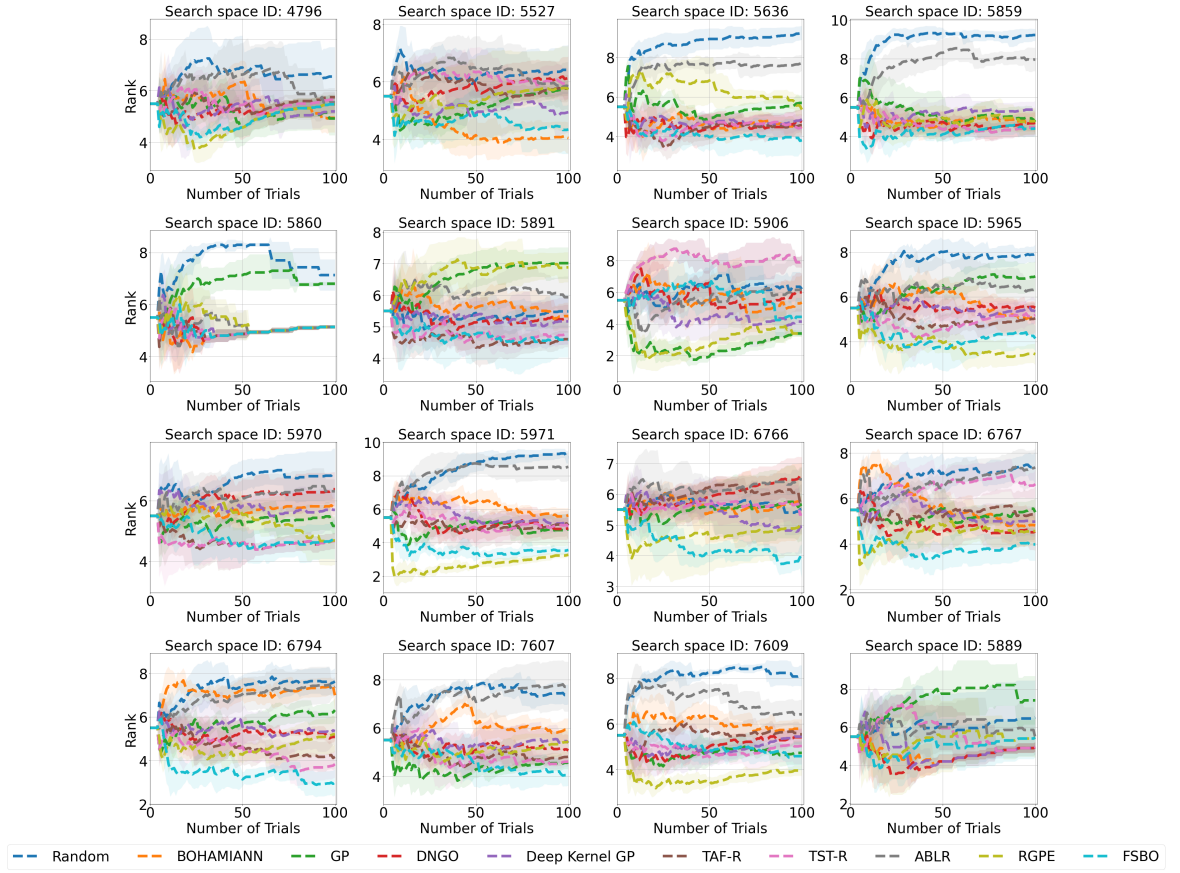

Figure 12: Mean rank comparison of **non-transfer** and **transfer learning** black-box HPO methods



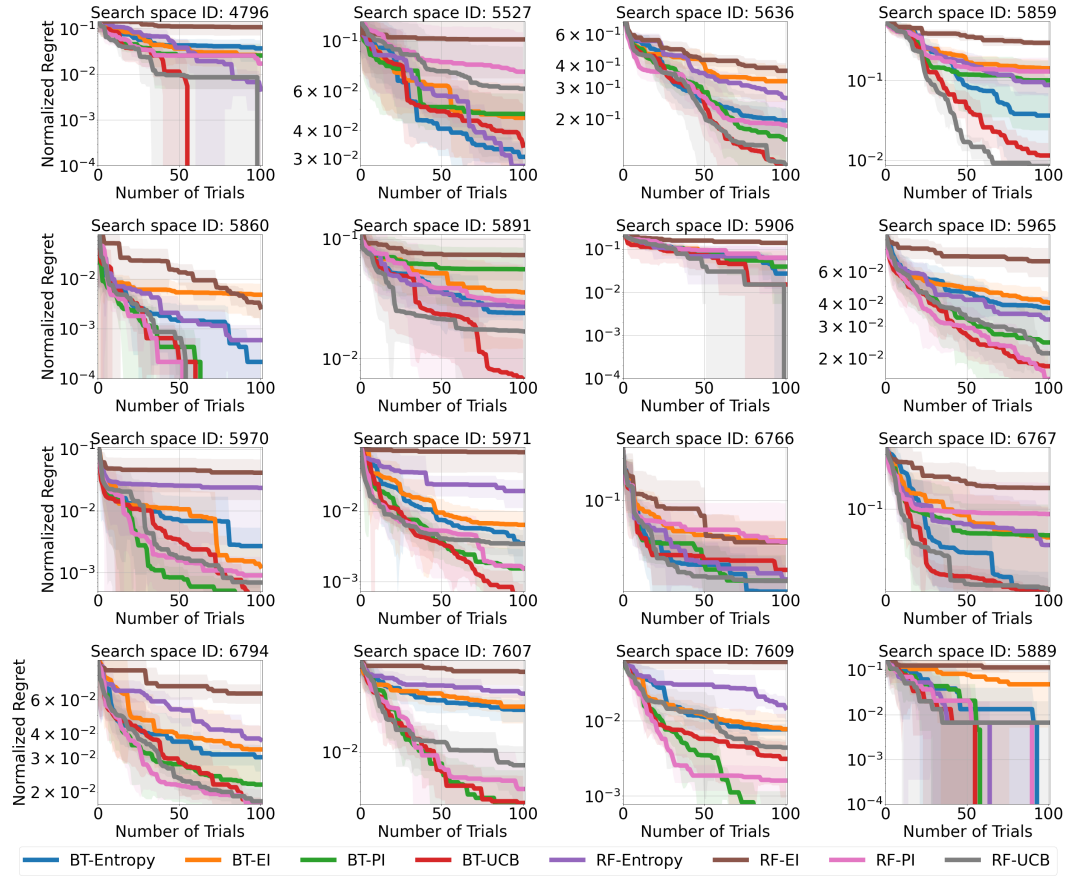

Figure 13: **Normalized regret** comparison of different acquisition functions: Expected Improvement (EI), Entropy (E) and Upper Confidence Bound (UCB) for Random Forest (RF) and Boosted Trees (BT) as surrogates.

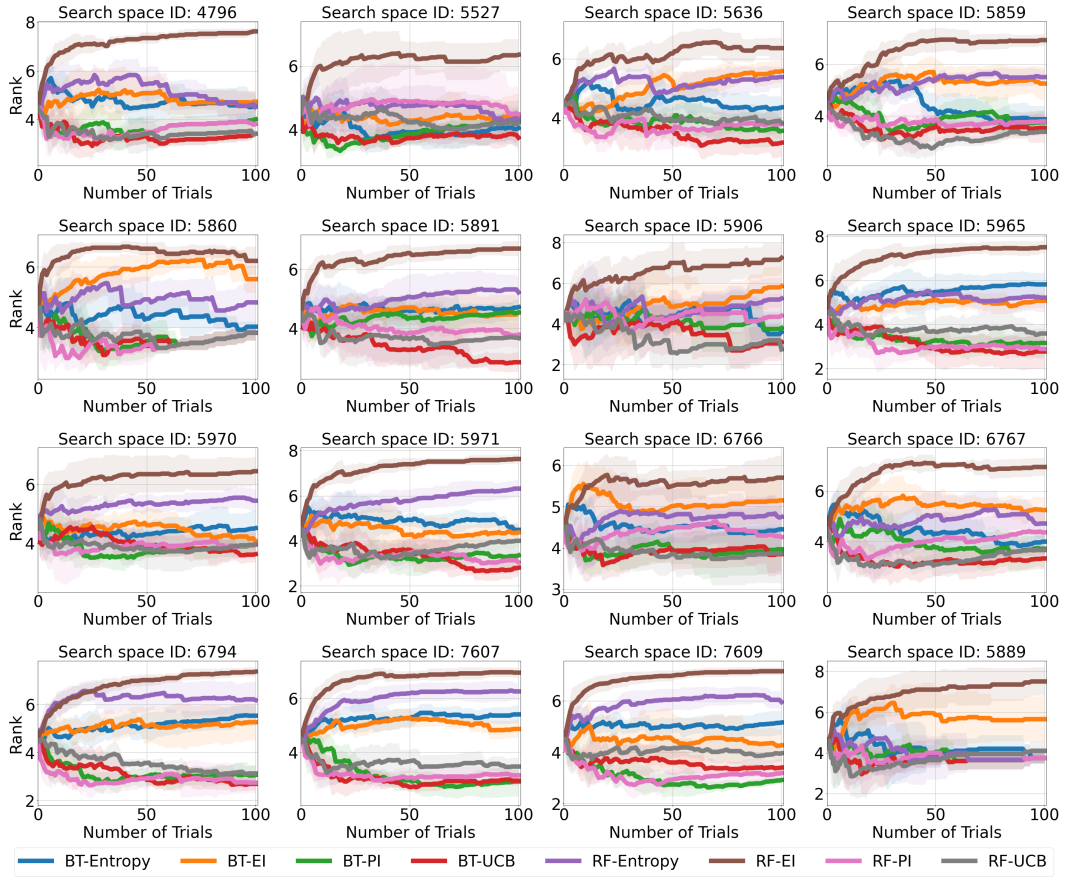

Figure 14: **Mean rank** comparison of different acquisition functions

Table 4: Hyperparameters of the search spaces HPO-B-v2/-v3

| Search Space Id | Search Name             | Space | List of hyperparameters within the Search-space                                                                                                                                                                                                               |
|-----------------|-------------------------|-------|---------------------------------------------------------------------------------------------------------------------------------------------------------------------------------------------------------------------------------------------------------------|
| 4796            | mlr.classif.rpart       |       | minsplit, minbucket, cp                                                                                                                                                                                                                                       |
| 5527            | mlr.classif.svm (6)     |       | cost, gamma, gamma.na, degree, degree.na, kernel.ohe.na, kernel.ohe.linear, kernel.ohe.polynomial                                                                                                                                                             |
| 5636            | mlr.classif.rpart (29)  |       | minsplit, minsplit.na, minbucket, cp, maxdepth, maxdepth.na                                                                                                                                                                                                   |
| 5859            | mlr.classif.rpart (31)  |       | minsplit, minsplit.na, minbucket, cp, maxdepth, maxdepth.na                                                                                                                                                                                                   |
| 5860            | mlr.classif.glmnet (4)  |       | alpha, lambda                                                                                                                                                                                                                                                 |
| 5891            | mlr.classif.svm (7)     |       | cost, gamma, gamma.na, degree, degree.na, kernel.ohe.na, kernel.ohe.linear, kernel.ohe.polynomial                                                                                                                                                             |
| 5906            | mlr.classif.xgboost (4) |       | eta, max_depth, max_depth.na, min_child_weight, min_child_weight.na, subsample, colsample_bytree, colsample_bytree.na, colsample_bylevel, colsample_bylevel.na, lambda, alpha, nrounds, nrounds.na, booster.ohe.na, booster.ohe.gblinear                      |
| 5965            | mlr.classif.ranger(9)   |       | num.trees, num.trees.na, mtry, sample.fraction, min.node.size, min.node.size.na, replace.ohe.FALSE, replace.ohe.na, respect.unordered.factors.ohe.INVALID, respect.unordered.factors.ohe.TRUE                                                                 |
| 5970            | mlr.classif.glmnet(5)   |       | alpha, lambda                                                                                                                                                                                                                                                 |
| 5971            | mlr.classif.xgboost (6) |       | eta, max_depth, max_depth.na, min_child_weight, min_child_weight.na, subsample, colsample_bytree, colsample_bytree.na, colsample_bylevel, colsample_bylevel.na, lambda, alpha, nrounds, nrounds.na, booster.ohe.na, booster.ohe.gblinear                      |
| 6766            | mlr.classif.glmnet (11) |       | alpha, lambda                                                                                                                                                                                                                                                 |
| 6767            | mlr.classif.xgboost (9) |       | eta, subsample, lambda, alpha, nthread, nthread.na, nrounds, nrounds.na, max_depth, max_depth.na, min_child_weight, min_child_weight.na, colsample_bytree, colsample_bytree.na, colsample_bylevel, colsample_bylevel.na, booster.ohe.na, booster.ohe.gblinear |
| 6794            | mlr.classif.ranger(13)  |       | num.trees, num.trees.na, mtry, sample.fraction, min.node.size, min.node.size.na, replace.ohe.FALSE, replace.ohe.na, respect.unordered.factors.ohe.na, respect.unordered.factors.ohe.TRUE                                                                      |
| 7607            | mlr.classif.ranger(15)  |       | num.trees, num.trees.na, mtry, min.node.size, sample.fraction, respect.unordered.factors.ohe.na, respect.unordered.factors.ohe.TRUE, replace.ohe.FALSE, replace.ohe.na                                                                                        |
| 7609            | mlr.classif.ranger(16)  |       | num.trees, num.trees.na, mtry, min.node.size, sample.fraction, respect.unordered.factors.ohe.na, respect.unordered.factors.ohe.TRUE, replace.ohe.FALSE, replace.ohe.na                                                                                        |
| 5889            | mlr.classif.ranger(7)   |       | num.trees, num.trees.na, mtry, sample.fraction, replace.ohe.FALSE, replace.ohe.na                                                                                                                                                                             |

Table 5: All the search-spaces contained in HPO-B-v1

| Search Space ID | Eval.  | Datasets | Dim. | Search Space Name                                                            |
|-----------------|--------|----------|------|------------------------------------------------------------------------------|
| 151             | 25     | 5        | 1    | weka.LMT                                                                     |
| 5886            | 295    | 33       | 9    | weka.J48                                                                     |
| 5918            | 192    | 32       | 13   | weka.IBk                                                                     |
| 5920            | 207    | 29       | 20   | weka.MultilayerPerceptron                                                    |
| 5923            | 265    | 32       | 16   | weka.RandomForest                                                            |
| 5926            | 83     | 32       | 10   | weka.SMO_PolyKernel                                                          |
| 5978            | 279    | 31       | 17   | weka.AttributeSelectedClassifier_J48                                         |
| 6007            | 248    | 31       | 15   | weka.AttributeSelectedClassifier_RandomForest                                |
| 6073            | 192    | 32       | 16   | weka.AttributeSelectedClassifier_IBk                                         |
| 6105            | 256    | 32       | 53   | weka.FilteredClassifier_RandomForest                                         |
| 6136            | 300    | 30       | 8    | weka.FilteredClassifier_J48                                                  |
| 6140            | 186    | 31       | 19   | weka.FilteredClassifier_IBk                                                  |
| 6154            | 186    | 31       | 17   | weka.FilteredClassifier-<br>_AttributeSelectedClassifier_IBk                 |
| 6183            | 64     | 32       | 41   | weka.FilteredClassifier_SMO_PolyKernel                                       |
| 6447            | 270    | 30       | 2    | weka.FilteredClassifier-<br>_AttributeSelectedClassifier_J48                 |
| 6458            | 240    | 30       | 3    | weka.FilteredClassifier-<br>_AttributeSelectedClassifier_RandomForest        |
| 534             | 302    | 65       | 1    | weka.Bagging_SMO_PolyKernel                                                  |
| 4796            | 10694  | 36       | 3    | mlr.classif.rpart.preproc                                                    |
| 5499            | 20     | 2        | 12   | sklearn.svm.classes.SVC                                                      |
| 5988            | 19     | 8        | 31   | weka.AttributeSelectedClassifier-<br>_SMO_PolyKernel                         |
| 5584            | 12     | 2        | 6    | sklearn.tree.tree.ExtraTreeClassifier                                        |
| 189             | 8      | 2        | 1    | weka.MultiBoostAB_JRip                                                       |
| 7064            | 7      | 1        | 8    | rm.process.polynomial_by_binomial-<br>_classification_support_vector_machine |
| 5527            | 385115 | 51       | 8    | mlr.classif.svm                                                              |
| 5636            | 503439 | 54       | 6    | mlr.classif.rpart                                                            |
| 5859            | 58809  | 56       | 6    | mlr.classif.rpart                                                            |
| 5860            | 3100   | 27       | 2    | mlr.classif.glmnet                                                           |
| 5890            | 1740   | 58       | 2    | mlr.classif.kknn                                                             |
| 5891            | 44091  | 51       | 8    | mlr.classif.svm                                                              |
| 5906            | 2289   | 24       | 16   | mlr.classif.xgboost                                                          |
| 5965            | 414678 | 60       | 10   | mlr.classif.ranger                                                           |
| 5968            | 918    | 8        | 8    | mlr.classif.ranger                                                           |
| 5970            | 68300  | 55       | 2    | mlr.classif.glmnet                                                           |
| 5971            | 44401  | 52       | 16   | mlr.classif.xgboost                                                          |
| 6308            | 1498   | 3        | 2    | mlr.classif.glmnet                                                           |
| 6762            | 4746   | 7        | 6    | mlr.classif.rpart                                                            |
| 6766            | 599056 | 51       | 2    | mlr.classif.glmnet                                                           |
| 6767            | 491497 | 52       | 18   | mlr.classif.xgboost                                                          |
| 6794            | 591831 | 52       | 10   | mlr.classif.ranger                                                           |
| 6856            | 2      | 1        | 1    | mlr.classif.randomForest                                                     |
| 7188            | 298    | 35       | 1    | mlr.classif.ranger.imputed.dummied.preproc                                   |
| 7189            | 2324   | 40       | 3    | mlr.classif.rpart.imputed.dummied.preproc                                    |
| 7190            | 1215   | 32       | 3    | mlr.classif.RRF.imputed.dummied.preproc                                      |
| 7607            | 18686  | 58       | 9    | mlr.classif.ranger                                                           |
| 7609            | 41631  | 59       | 9    | mlr.classif.ranger                                                           |
| 5624            | 2486   | 5        | 7    | mlr.classif.rpart                                                            |
| 124             | 13     | 2        | 1    | weka.MultilayerPerceptron                                                    |

|      |       |    |    |                                                                    |
|------|-------|----|----|--------------------------------------------------------------------|
| 153  | 5     | 1  | 1  | weka.Bagging_RandomTree                                            |
| 243  | 5     | 1  | 1  | weka.RotationForest_PrincipalComponents_J48                        |
| 245  | 5     | 1  | 1  | weka.RotationForest_PrincipalComponents-<br>_REPTree               |
| 246  | 5     | 1  | 1  | weka.RotationForest_PrincipalComponents-<br>_RandomTree            |
| 247  | 5     | 1  | 1  | weka.RotationForest_PrincipalComponents-<br>_RandomForest          |
| 248  | 5     | 1  | 1  | weka.RotationForest_PrincipalComponents-<br>_LMT                   |
| 423  | 10    | 2  | 1  | weka.AdaBoostM1_SMO_PolyKernel                                     |
| 506  | 34    | 9  | 1  | weka.RotationForest_PrincipalComponents_J48                        |
| 633  | 5     | 1  | 1  | weka.RotationForest_PrincipalComponents-<br>_LMT                   |
| 2553 | 4     | 1  | 1  | weka.AttributeSelectedClassifier-<br>_CfsSubsetEval_BestFirst_IBk  |
| 4006 | 8     | 2  | 1  | weka.LibSVM                                                        |
| 5526 | 149   | 7  | 2  | mlr.classif.kknn                                                   |
| 7286 | 31    | 1  | 2  | mlr.classif.glmnet                                                 |
| 7290 | 10    | 1  | 4  | mlr.classif.rpart                                                  |
| 5626 | 79    | 3  | 17 | sklearn.ensemble.gradient_boosting-<br>_GradientBoostingClassifier |
| 5889 | 1433  | 20 | 6  | mlr.classif.ranger                                                 |
| 5458 | 28    | 4  | 16 | mlr.classif.develpartykit.ctree                                    |
| 5489 | 30    | 5  | 14 | mlr.classif.develpartykit.ctree                                    |
| 4828 | 264   | 1  | 10 | mlr.classif.ksvm                                                   |
| 214  | 4     | 1  | 1  | weka.AdaBoostM1_NaiveBayes                                         |
| 6741 | 6     | 1  | 21 | weka.AttributeSelectedClassifier-<br>_MultilayerPerceptron         |
| 158  | 5     | 1  | 1  | weka.Bagging_JRip                                                  |
| 2566 | 2     | 1  | 2  | classif.IBk                                                        |
| 3894 | 49    | 4  | 6  | mlr.classif.rpart.preproc                                          |
| 6003 | 13537 | 2  | 18 | mlr.classif.xgboost                                                |
| 6765 | 1002  | 3  | 2  | mlr.classif.glmnet                                                 |
| 5963 | 809   | 2  | 15 | mlr.classif.xgboost                                                |
| 6000 | 496   | 1  | 2  | mlr.classif.glmnet                                                 |
| 6322 | 525   | 2  | 8  | mlr.classif.svm                                                    |
| 5623 | 795   | 3  | 3  | mlr.classif.glmnet                                                 |
| 5969 | 2543  | 4  | 8  | mlr.classif.svm                                                    |
| 3737 | 2     | 1  | 2  | mlr.classif.randomForest                                           |
| 829  | 4     | 1  | 4  | weka.Stacking_REPTree                                              |
| 833  | 5     | 1  | 5  | weka.Stacking_ZeroR                                                |
| 935  | 6     | 1  | 4  | weka.LogitBoost_RandomSubSpace_REPTree                             |
| 6323 | 30    | 1  | 2  | mlr.classif.kknn                                                   |
| 7200 | 811   | 1  | 19 | mlr.classif.xgboost                                                |
| 673  | 96    | 5  | 1  | HIKNN                                                              |
| 674  | 84    | 5  | 1  | ANHBNN                                                             |
| 678  | 96    | 5  | 1  | HwKNN                                                              |
| 679  | 96    | 5  | 1  | KNN                                                                |
| 680  | 83    | 5  | 1  | NHBNN                                                              |
| 681  | 95    | 5  | 1  | HFNN                                                               |
| 682  | 95    | 5  | 1  | DWHFNN                                                             |
| 683  | 95    | 5  | 1  | CBWkNN                                                             |
| 684  | 95    | 5  | 1  | NWkNN                                                              |
| 685  | 95    | 5  | 1  | AKNN                                                               |

|      |      |   |    |                                                                 |
|------|------|---|----|-----------------------------------------------------------------|
| 688  | 11   | 1 | 1  | HubMiner.HIKNN                                                  |
| 689  | 11   | 1 | 1  | HubMiner.HwKNN                                                  |
| 690  | 11   | 1 | 1  | HubMiner.KNN                                                    |
| 691  | 4    | 1 | 1  | HubMiner.NHBNN                                                  |
| 692  | 11   | 1 | 1  | HubMiner.HFNN                                                   |
| 693  | 11   | 1 | 1  | HubMiner.DWHFNN                                                 |
| 694  | 11   | 1 | 1  | HubMiner.CBWkNN                                                 |
| 695  | 11   | 1 | 1  | HubMiner.NWKNN                                                  |
| 696  | 11   | 1 | 1  | HubMiner.AKNN                                                   |
| 697  | 11   | 1 | 1  | HubMiner.ANHBNN                                                 |
| 3994 | 64   | 5 | 1  | mlr.classif.kknn.preproc.preproc                                |
| 5964 | 506  | 2 | 9  | mlr.classif.ranger                                              |
| 5972 | 120  | 4 | 2  | mlr.classif.kknn                                                |
| 6075 | 495  | 1 | 6  | mlr.classif.rpart                                               |
| 2010 | 7    | 1 | 8  | weka.SimpleLogistic                                             |
| 2039 | 26   | 2 | 14 | weka.AdaBoostM1_RandomForest                                    |
| 2073 | 133  | 3 | 13 | weka.Bagging_LogitBoost_DecisionStump                           |
| 2277 | 202  | 3 | 15 | weka.Bagging_RandomForest                                       |
| 3489 | 141  | 3 | 12 | weka.NaiveBayes                                                 |
| 3490 | 481  | 3 | 29 | weka.J48                                                        |
| 3502 | 17   | 2 | 6  | weka.ZeroR                                                      |
| 3960 | 18   | 1 | 15 | weka.IterativeClassifierOptimizer_LogitBoost-<br>_DecisionStump |
| 4289 | 7    | 1 | 20 | weka.FilteredClassifier_J48                                     |
| 5218 | 6    | 1 | 19 | weka.FilteredClassifier_RandomForest                            |
| 5237 | 8    | 1 | 8  | weka.FilteredClassifier_RandomForest                            |
| 5253 | 2    | 1 | 2  | weka.Vote_RandomForest                                          |
| 5295 | 8    | 1 | 13 | weka.LogitBoost_DecisionStump                                   |
| 5301 | 8    | 1 | 15 | weka.Bagging_LogitBoost_DecisionStump                           |
| 5315 | 5    | 1 | 9  | weka.IBk                                                        |
| 2614 | 6    | 1 | 2  | matrixnet_on_MagicTelescope_implementation                      |
| 2629 | 35   | 1 | 6  | sklearn.ensemble.forest.RandomForestClassifier                  |
| 2793 | 8    | 1 | 12 | classif.randomForest                                            |
| 2799 | 7    | 1 | 7  | sklearn.ensemble.forest.RandomForestClassifier                  |
| 2823 | 8    | 1 | 11 | sklearn.ensemble.forest.RandomForestClassifier                  |
| 3414 | 19   | 1 | 2  | sklearn.ensemble.weight-<br>_boosting.AdaBoostClassifier        |
| 3425 | 8    | 1 | 9  | sklearn.neural_network-<br>.multilayer_perceptron.MLPClassifier |
| 3434 | 42   | 1 | 19 | sklearn.ensemble.forest.ExtraTreesClassifier                    |
| 3439 | 6    | 1 | 3  | sklearn.ensemble.weight-<br>_boosting.AdaBoostClassifier        |
| 3442 | 11   | 1 | 5  | sklearn.neighbors.classification-<br>.KNeighborsClassifier      |
| 5503 | 14   | 2 | 2  | sklearn.neighbors.classification-<br>.KNeighborsClassifier      |
| 6131 | 30   | 1 | 2  | mlr.classif.kknn                                                |
| 5435 | 2374 | 4 | 3  | mlr.classif.rpart.preproc                                       |
| 7021 | 11   | 1 | 3  | sklearn.naive_bayes.BernoulliNB                                 |
| 5502 | 6    | 1 | 8  | sklearn.tree.tree.DecisionTreeClassifier                        |
| 5521 | 11   | 1 | 3  | xgboost.sklearn.XGBClassifier                                   |
| 5604 | 6    | 1 | 12 | sklearn.ensemble.forest.ExtraTreesClassifier                    |

|      |    |   |    |                                                                                             |
|------|----|---|----|---------------------------------------------------------------------------------------------|
| 5704 | 11 | 1 | 3  | DeepForest.DeepForest                                                                       |
| 5788 | 3  | 1 | 3  | __main__.AUC_Booster                                                                        |
| 5813 | 51 | 1 | 10 | __main__.AUCLGBMClassifier                                                                  |
| 7680 | 53 | 1 | 2  | mlr.classif.glmnet                                                                          |
| 7604 | 20 | 1 | 2  | mlr.classif.kknn                                                                            |
| 5919 | 6  | 1 | 5  | weka.SimpleLogistic                                                                         |
| 5921 | 7  | 1 | 3  | weka.Bagging_J48                                                                            |
| 5922 | 9  | 1 | 10 | weka.Bagging_RandomForest                                                                   |
| 5960 | 6  | 1 | 7  | weka.AdaBoostM1_RandomForest                                                                |
| 6024 | 43 | 1 | 10 | weka.AttributeSelectedClassifier_BayesNet                                                   |
| 6124 | 5  | 1 | 18 | weka.FilteredClassifier_FilteredClassifier-<br>_RandomForest                                |
| 6134 | 6  | 1 | 11 | weka.J48                                                                                    |
| 6137 | 7  | 1 | 18 | weka.FilteredClassifier_NaiveBayes                                                          |
| 6139 | 4  | 1 | 16 | weka.FilteredClassifier_RandomTree                                                          |
| 6155 | 8  | 1 | 7  | weka.FilteredClassifier_FilteredClassifier-<br>_FilteredClassifier_IBk                      |
| 6156 | 12 | 1 | 1  | weka.FilteredClassifier_FilteredClassifier_IBk                                              |
| 6182 | 7  | 1 | 3  | weka.Bagging_FilteredClassifier_LMT                                                         |
| 6189 | 54 | 1 | 20 | weka.RandomizableFilteredClassifier-<br>_RandomForest                                       |
| 6190 | 11 | 1 | 6  | weka.RandomizableFilteredClassifier-<br>_MultilayerPerceptron                               |
| 6211 | 21 | 1 | 15 | weka.FilteredClassifier_SMO_RBFKernel                                                       |
| 6212 | 20 | 1 | 4  | weka.RandomizableFilteredClassifier-<br>_SMO_PolyKernel                                     |
| 6213 | 7  | 1 | 3  | weka.RandomizableFilteredClassifier-<br>_Bagging_RandomForest                               |
| 6215 | 13 | 1 | 10 | weka.RandomizableFilteredClassifier_J48                                                     |
| 6216 | 8  | 1 | 5  | weka.RandomizableFilteredClassifier_LMT                                                     |
| 6271 | 14 | 1 | 18 | weka.FilteredClassifier_Bagging-<br>_AdaBoostM1_J48                                         |
| 6285 | 19 | 1 | 10 | weka.FilteredClassifier_FilteredClassifier-<br>_Vote_RandomForest                           |
| 6309 | 4  | 1 | 7  | weka.FilteredClassifier_Bagging_AdaBoostM1-<br>_FilteredClassifier_J48                      |
| 6345 | 10 | 1 | 20 | weka.RandomizableFilteredClassifier-<br>_RandomTree                                         |
| 6347 | 13 | 1 | 2  | weka.Bagging_FilteredClassifier_J48                                                         |
| 6364 | 6  | 1 | 3  | weka.RandomizableFilteredClassifier_BayesNet                                                |
| 6365 | 10 | 1 | 4  | weka.RandomizableFilteredClassifier-<br>_NaiveBayes                                         |
| 6376 | 17 | 1 | 7  | weka.RandomizableFilteredClassifier-<br>_SimpleLogistic                                     |
| 6433 | 16 | 1 | 18 | weka.RandomizableFilteredClassifier-<br>_AdaBoostM1_RandomForest                            |
| 6461 | 6  | 1 | 8  | weka.NaiveBayesUpdateable                                                                   |
| 6493 | 14 | 1 | 15 | weka.FilteredClassifier_FilteredClassifier-<br>_DecisionTable                               |
| 6507 | 20 | 1 | 3  | weka.FilteredClassifier_FilteredClassifier-<br>_RandomizableFilteredClassifier_RandomForest |

Table 6: Number of evaluations per search space in the meta-test split of HPO-B-v3

| Search Space ID | Dataset ID | No. Evaluations | Space ID | Dataset ID | No. Evaluations |
|-----------------|------------|-----------------|----------|------------|-----------------|
| 4796            | 3549       | 300             | 5970     | 49         | 3164            |
| 4796            | 3918       | 300             | 5970     | 34536      | 3286            |
| 4796            | 9903       | 300             | 5970     | 14951      | 3634            |
| 4796            | 23         | 300             | 5971     | 10093      | 2265            |
| 5527            | 146064     | 44790           | 5971     | 3954       | 2392            |
| 5527            | 146065     | 55627           | 5971     | 43         | 3373            |
| 5527            | 9914       | 59355           | 5971     | 34536      | 3487            |
| 5527            | 145804     | 59439           | 5971     | 9970       | 3866            |
| 5527            | 31         | 60574           | 5971     | 6566       | 4254            |
| 5527            | 10101      | 74531           | 6766     | 3903       | 39155           |
| 5636            | 146064     | 43841           | 6766     | 146064     | 43785           |
| 5636            | 145804     | 46496           | 6766     | 145953     | 47439           |
| 5636            | 9914       | 49668           | 6766     | 145804     | 52737           |
| 5636            | 146065     | 50509           | 6766     | 31         | 60721           |
| 5636            | 10101      | 69158           | 6766     | 10101      | 66277           |
| 5636            | 31         | 79629           | 6767     | 146065     | 44258           |
| 5859            | 9983       | 2878            | 6767     | 145804     | 45103           |
| 5859            | 31         | 3020            | 6767     | 146064     | 46066           |
| 5859            | 37         | 3254            | 6767     | 9914       | 47410           |
| 5859            | 3902       | 3397            | 6767     | 9967       | 48624           |
| 5859            | 9977       | 3464            | 6767     | 31         | 68248           |
| 5859            | 125923     | 5047            | 6794     | 145804     | 52448           |
| 5860            | 14965      | 200             | 6794     | 3          | 55460           |
| 5860            | 9976       | 268             | 6794     | 146065     | 60779           |
| 5860            | 3493       | 389             | 6794     | 10101      | 65952           |
| 5891            | 9889       | 2584            | 6794     | 9914       | 69200           |
| 5891            | 3899       | 2587            | 6794     | 31         | 102306          |
| 5891            | 6566       | 2779            | 7607     | 14965      | 647             |
| 5891            | 9980       | 2943            | 7607     | 145976     | 677             |
| 5891            | 3891       | 3083            | 7607     | 3896       | 692             |
| 5891            | 3492       | 3317            | 7607     | 3913       | 696             |
| 5906            | 9971       | 254             | 7607     | 3903       | 699             |
| 5906            | 3918       | 259             | 7607     | 9946       | 722             |
| 5965            | 145836     | 11228           | 7607     | 9967       | 895             |
| 5965            | 9914       | 11320           | 7609     | 145854     | 1269            |
| 5965            | 3903       | 11536           | 7609     | 3903       | 1292            |
| 5965            | 10101      | 11648           | 7609     | 9967       | 1293            |
| 5965            | 9889       | 12319           | 7609     | 145853     | 1296            |
| 5965            | 49         | 12406           | 7609     | 34537      | 1452            |
| 5965            | 9946       | 13140           | 7609     | 125923     | 1494            |
| 5970            | 37         | 2829            | 7609     | 145878     | 1593            |
| 5970            | 3492       | 2947            | 5889     | 9971       | 298             |
| 5970            | 9952       | 3163            | 5889     | 3918       | 300             |
